# Supplementary material
Source: Copernicus journal article supplement (doi:10.5194/egusphere-2026-1913)
Supplement: Supplementary file 1 [file egusphere-2026-1913-supplement.pdf]

## Supplementary Information for

### **Measurement report: Soil reactive nitrogen gas emissions from the Tibetan Plateau**

Lingling Deng<sup>1,#</sup>, Yuhan Chen<sup>1,#</sup>, Chunxiang Ye<sup>2</sup>, Rui Wang<sup>1</sup>, Ruhai Wang<sup>3</sup>, Zehua Fu<sup>3</sup>, Hongfang Zhao<sup>1,\*</sup>, Dianming Wu<sup>1,\*</sup>

<sup>1</sup>Key Laboratory of Geographic Information Science (Ministry of Education), School of Geographic Sciences, East China Normal University, 200241 Shanghai, China

<sup>2</sup>State Key Joint Laboratory for Environmental Simulation and Pollution Control, Center for Environment and Health, College of Environmental Sciences and Engineering, Peking University, Beijing 100871, P. R. China

<sup>3</sup>State Key Laboratory of Soil and Sustainable Agriculture, Institute of soil Sciences, Chinese Academy of Sciences, 210008 Nanjing, China

<sup>#</sup>Lingling Deng and Yuhan Chen contributed equally to this work.

*Correspondence to:* Dianming Wu ([dmwu@geo.ecnu.edu.cn](mailto:dmwu@geo.ecnu.edu.cn)), Hongfang Zhao ([hfzhao@geo.ecnu.edu.cn](mailto:hfzhao@geo.ecnu.edu.cn))

#### **This PDF file includes:**

Tables S1 to S10

Figs. S1 to S8

**Table S1. Information on soil sampling sites in Linzhi, Tibet.**

| Sample ID | Longitude (°E) | Latitude (°N) | Elevation (m) | Land type |
|-----------|----------------|---------------|---------------|-----------|
| G1        | 94.74          | 29.76         | 3320.0        | Grassland |
| G2        | 94.62          | 29.63         | 4333.3        | Grassland |
| G3        | 94.72          | 29.70         | 3441.8        | Grassland |
| G4        | 94.72          | 29.69         | 3436.4        | Grassland |
| C1        | 94.73          | 29.76         | 3329.1        | Cropland  |
| C2        | 94.73          | 29.75         | 3346.4        | Cropland  |
| C3        | 94.42          | 29.56         | 2959.1        | Cropland  |
| C4        | 94.44          | 29.54         | 2954.1        | Cropland  |
| C5        | 94.44          | 29.41         | 2924.5        | Cropland  |
| C6        | 94.40          | 29.62         | 3031.7        | Cropland  |
| C7        | 94.43          | 29.59         | 2969.7        | Cropland  |
| C8        | 94.51          | 29.42         | 2940.4        | Cropland  |
| F1        | 94.73          | 29.76         | 3335.6        | Forest    |
| F2        | 94.72          | 29.73         | 3400.7        | Forest    |
| F3        | 94.73          | 29.67         | 3529.8        | Forest    |
| F4        | 94.40          | 29.62         | 3054.5        | Forest    |
| F5        | 94.43          | 29.44         | 2925.7        | Forest    |
| F6        | 94.82          | 29.47         | 2925.9        | Forest    |
| F7        | 94.82          | 29.47         | 2918.6        | Forest    |
| F8        | 94.46          | 29.45         | 2929.2        | Forest    |
| W1        | 94.62          | 29.63         | 4330.6        | Wetland   |
| W2        | 94.46          | 29.45         | 2924.7        | Wetland   |
| W3        | 94.46          | 29.45         | 2923.2        | Wetland   |
| BL1       | 94.43          | 29.44         | 2923.9        | Bare land |
| BL2       | 94.82          | 29.47         | 2913.9        | Bare land |

**Table S2. PCR reaction systems for soil bacteria, archaea and fungi.**

| Community                                         | Primer                  | Reaction Component                                | Volume ( $\mu\text{L}$ ) |
|---------------------------------------------------|-------------------------|---------------------------------------------------|--------------------------|
| Bacteria                                          | 338F/806R               | 5 $\times$ FastPfu Buffer                         | 4                        |
|                                                   |                         | 2.5 mM dNTPs                                      | 2                        |
|                                                   |                         | Forward Primer(5 $\mu\text{M}$ )                  | 0.8                      |
|                                                   |                         | Reverse Primer(5 $\mu\text{M}$ )                  | 0.8                      |
|                                                   |                         | FastPfu Polymerase                                | 0.4                      |
|                                                   |                         | BSA                                               | 0.2                      |
|                                                   |                         | Template DNA                                      | 10 ng                    |
|                                                   |                         | Supplement ddH <sub>2</sub> O to 20 $\mu\text{L}$ |                          |
| Archaea                                           | 524F10extF/Arch958RmodR | 2 $\times$ Pro Taq                                | 10                       |
|                                                   |                         | Forward Primer(5 $\mu\text{M}$ )                  | 0.8                      |
|                                                   |                         | Reverse Primer(5 $\mu\text{M}$ )                  | 0.8                      |
|                                                   |                         | Template DNA                                      | 10 ng                    |
|                                                   |                         | Supplement ddH <sub>2</sub> O to 20 $\mu\text{L}$ |                          |
|                                                   |                         | Fungi                                             | ITS1F/ITS2R              |
| 2.5 mM dNTPs                                      | 2                       |                                                   |                          |
| Forward Primer(5 $\mu\text{M}$ )                  | 0.8                     |                                                   |                          |
| Reverse Primer(5 $\mu\text{M}$ )                  | 0.8                     |                                                   |                          |
| rTaq Polymerase                                   | 0.2                     |                                                   |                          |
| BSA                                               | 0.2                     |                                                   |                          |
| Template DNA                                      | 10 ng                   |                                                   |                          |
| Supplement ddH <sub>2</sub> O to 20 $\mu\text{L}$ |                         |                                                   |                          |

**Table S3. Primers and conditions used for real-time quantitative PCR.**

| Sample                                   | Primer set                                  | Target genes     | Amplicon length (bp) | Thermal profile                    | Plasmid dilution                   | R <sup>2</sup> | Efficiency (%) |
|------------------------------------------|---------------------------------------------|------------------|----------------------|------------------------------------|------------------------------------|----------------|----------------|
| Natural soil                             | Arch_amoAF (STAATGGTCTGGCTTAGACG)           | <i>amoA</i>      | 635                  | 95°C, 3min; 40 cycles (95°C, 5s;   | 10 <sup>-2</sup> ~10 <sup>-8</sup> | 0.9998         | 102.71         |
|                                          | Arch_amoAR (GCGGCCATCCATCTGTATGT)           |                  |                      | 58°C, 30s; 72°C, 1min)             |                                    |                |                |
|                                          | <i>narG</i> 145F (ACSCAYGGSGTDAACTGYAC)     | <i>narG</i>      | 626                  | 95°C, 3min; 40 cycles (95°C, 5s;   | 10 <sup>-1</sup> ~10 <sup>-8</sup> | 0.9952         | 88.21          |
|                                          | <i>narG</i> 773R (GGNACGTTNGADCCCCA)        |                  |                      | 58°C, 30s; 72°C, 1min)             |                                    |                |                |
|                                          | <i>nirK</i> C2F (TGCACATCGCCAACGGNATGTWYGG) | <i>nirK</i>      | 459                  | 95°C, 3min; 40 cycles (95°C, 5s;   | 10 <sup>-1</sup> ~10 <sup>-8</sup> | 0.9982         | 100.00         |
|                                          | <i>nirK</i> C2R (GGCGCGGAAGATGSHRTGRTCNA)   |                  |                      | 58°C, 30s; 72°C, 1min)             |                                    |                |                |
|                                          | <i>napA</i> 3F (CCCAATGCTCGCCACTG)          | <i>napA</i>      | 130                  | 95°C, 3min; 40 cycles (95°C, 5s;   | 10 <sup>-1</sup> ~10 <sup>-6</sup> | 0.9995         | 104.93         |
|                                          | <i>napA</i> 3R (CATGTTKGAGCCCCACAG)         |                  |                      | 58°C, 30s; 72°C, 1min)             |                                    |                |                |
|                                          | <i>nosZ</i> F (CGYTGTTCMTCGACAGCCAG)        | <i>nosZ</i>      | 454                  | 95°C, 3min; 40 cycles (95°C, 5s;   | 10 <sup>-1</sup> ~10 <sup>-8</sup> | 0.9947         | 93.47          |
| <i>nosZ</i> 1622R (CGSACCTTSTTGCCSTYGGC) | 58°C, 30s; 72°C, 1min)                      |                  |                      |                                    |                                    |                |                |
| Fumigation soil                          | Arch_amoAF (STAATGGTCTGGCTTAGACG)           | <i>amoA</i> _AOA | 635                  | 50°C, 2min; 95°C, 30s; 40 cycles   | 10 <sup>-1</sup> ~10 <sup>-7</sup> | 0.9986         | 101.86         |
|                                          | Arch_amoAR (GCGGCCATCCATCTGTATGT)           |                  |                      | (95°C, 5s; 55°C, 30s; 72°C, 45s)   |                                    |                |                |
|                                          | <i>amoA</i> 1F (GGGGTTTCTACTGGTGGT)         | <i>amoA</i> _AOB | 491                  | 50°C, 2min; 95°C, 30s; 40 cycles   | 10 <sup>-1</sup> ~10 <sup>-7</sup> | 0.9971         | 86.77          |
|                                          | <i>amoA</i> 2R (CCCCTCKGSAAAGCCTTCTTC)      |                  |                      | (95°C, 5s; 55°C, 30s; 72°C, 45s)   |                                    |                |                |
|                                          | CA377f (GTGGTGGTGGTCBAAAYTA)                | comammox         | 198                  | 50°C, 2min; 95°C, 30s; 40 cycles   | 10 <sup>-1</sup> ~10 <sup>-7</sup> | 0.9980         | 103.25         |
|                                          | C576r (GAAGCCCATRTARTCNGCC)                 |                  |                      | Clade A                            |                                    |                |                |
|                                          | F1 <i>nxrA</i> (CAGACCGACGTGTGCGAAAG)       | <i>nxrA</i>      | 324                  | 50°C, 2min; 95°C, 30s; 40 cycles   | 10 <sup>-1</sup> ~10 <sup>-7</sup> | 0.9980         | 104.46         |
|                                          | R2 <i>nxrA</i> (TCCACAAGGAACGGAAGGTC)       |                  |                      | (95°C, 5s; 55°C, 30s; 72°C, 30s)   |                                    |                |                |
|                                          | <i>nxrB</i> 169f (TACATGTGGTGGAAACA)        | <i>nxrB</i>      | 485                  | 50°C, 2min; 95°C, 30s; 40 cycles   | 10 <sup>-1</sup> ~10 <sup>-7</sup> | 0.9979         | 98.25          |
|                                          | <i>nxrB</i> 638r (CGGTTCTGGTTCRATCA)        |                  |                      | (95°C, 5s; 56.2°C, 40s; 72°C, 45s) |                                    |                |                |
|                                          | <i>napA</i> _F1 (CTGGACIATGGGYTTIAACCA)     | <i>napA</i>      | 492                  | 50°C, 2min; 95°C, 30s; 40 cycles   | 10 <sup>-1</sup> ~10 <sup>-7</sup> | 0.9974         | 96.75          |
| <i>napA</i> _R1 (CCTTCYTTYTCIACCCACAT)   | (95°C, 5s; 58°C, 40s; 72°C, 30s)            |                  |                      |                                    |                                    |                |                |
| F1aCu (ATCATGGTCTGCCGCG)                 | <i>nirK</i>                                 | 473              |                      | 10 <sup>-1</sup> ~10 <sup>-7</sup> | 0.9982                             | 95.63          |                |

|                                          |             |     |  |                                                                       |                                    |        |        |
|------------------------------------------|-------------|-----|--|-----------------------------------------------------------------------|------------------------------------|--------|--------|
| R3Cu (GCCTCGATCAGRTTGTGGTT)              |             |     |  | 50°C, 2min; 95°C, 30s; 40 cycles<br>(95°C, 5s; 60°C, 30s; 72°C, 30s)  |                                    |        |        |
| cd3aF (GTSAACG TSAAGGARACSGG)            | <i>nirS</i> | 425 |  | 50°C, 2min; 95°C, 30s; 40 cycles<br>(95°C, 5s; 58°C, 40s; 72°C, 1min) | 10 <sup>-1</sup> ~10 <sup>-7</sup> | 0.9979 | 102.94 |
| R3cd (GASTTCGGRTGSGTCTTGA)               |             |     |  |                                                                       |                                    |        |        |
| <i>nosZ</i> F (CGYTGTTCMTCGACAGCCAG)     | <i>nosZ</i> | 454 |  | 50°C, 2min; 95°C, 30s; 40 cycles<br>(95°C, 5s; 58°C, 30s; 72°C, 1min) | 10 <sup>-1</sup> ~10 <sup>-7</sup> | 0.9992 | 90.70  |
| <i>nosZ</i> 1622R (CGSACCTTSTTGCCSTYGCG) |             |     |  |                                                                       |                                    |        |        |

**Table S4. Emissions of soil Nr gas and soil properties in literature.**

| Latitude<br>(°N) | Longitude<br>(°E) | NO maximum<br>flux<br>(ng N m <sup>-2</sup> s <sup>-1</sup> ) | NO emission<br>intensity<br>(kg N ha <sup>-1</sup> yr <sup>-1</sup> ) | pH   | Moisture<br>(%) | NO <sub>3</sub> <sup>-</sup> -N<br>(mg kg <sup>-1</sup> ) | NH <sub>4</sub> <sup>+</sup> -N<br>(mg kg <sup>-1</sup> ) | TN<br>(%) | Land use<br>type | Reference            |
|------------------|-------------------|---------------------------------------------------------------|-----------------------------------------------------------------------|------|-----------------|-----------------------------------------------------------|-----------------------------------------------------------|-----------|------------------|----------------------|
| 34.03            | 102.73            | 3.33                                                          | 0.021                                                                 | 6.7  | 60              | 4.4                                                       | 10                                                        | 0.57      | Grassland        | (Zhang et al., 2018) |
| 34.06            | 102.73            | 21.67                                                         | 0.094                                                                 | 7.1  | 40              | 1.7                                                       | 18.4                                                      | 0.52      | Grassland        | (Zhang et al., 2018) |
| 34.05            | 102.6             | 52                                                            | 0.29                                                                  | NA   | 50              | 21.32                                                     | 2.98                                                      | NA        | Grassland        | (Gao et al., 2016)   |
| 34.04            | 102.72            | 40                                                            | 0.047                                                                 | 6.48 | 22              | 46.3                                                      | 27.4                                                      | 0.94      | Forest           | (Yao et al., 2019)   |
| 34.04            | 102.72            | 40                                                            | 0.022                                                                 | 6.69 | 55              | 7.5                                                       | 2.3                                                       | 0.57      | Grassland        | (Yao et al., 2019)   |
| 37.61            | 101.31            | 95                                                            | 0.056                                                                 | 8    | 49              | 1.7                                                       | 5.1                                                       | 0.48      | Grassland        | (Lin et al., 2019)   |
| 37.61            | 101.31            | 475                                                           | 0.208                                                                 | 8.3  | 36              | 16.1                                                      | 2.3                                                       | 0.44      | Cropland         | (Lin et al., 2019)   |

NA: no data available.

**Table S5. Physical and chemical properties of soil.**

| Physicochemical properties                                       | Forest           | Grassland       | Cropland        | Wetland          | Bare land       | <i>p</i> value      |
|------------------------------------------------------------------|------------------|-----------------|-----------------|------------------|-----------------|---------------------|
| pH                                                               | 6.47 ± 1.21 abcd | 5.10 ± 0.19 b   | 6.36 ± 0.64 bd  | 7.84 ± 0.19 ac   | 8.14 ± 0.18 a   | <b><i>0.009</i></b> |
| TN (%)                                                           | 0.17 ± 0.13 b    | 0.52 ± 0.24 a   | 0.18 ± 0.07 b   | 0.10 ± 0.12 b    | 0.03 ± 0.01 b   | <b><i>0.018</i></b> |
| TC (%)                                                           | 2.98 ± 2.47 b    | 8.38 ± 4.99 a   | 2.18 ± 0.97 b   | 1.49 ± 2.04 b    | 0.33 ± 0.11 b   | <b><i>0.021</i></b> |
| C/N ratio                                                        | 15.78 ± 2.82 a   | 15.41 ± 2.09 ac | 11.88 ± 1.33 b  | 12.35 ± 3.20 ab  | 12.92 ± 0.59 ab | <b><i>0.020</i></b> |
| NO <sub>3</sub> <sup>-</sup> (mg kg <sup>-1</sup> )              | 6.91 ± 8.45 a    | 11.16 ± 4.80 a  | 21.74 ± 19.13 a | 1.01 ± 1.01 a    | 5.11 ± 0.68 a   | 0.059               |
| NO <sub>2</sub> <sup>-</sup> (mg kg <sup>-1</sup> )              | 0.23 ± 0.47 a    | 0.00 ± 0.00 a   | 0.15 ± 0.29 a   | 0.01 ± 0.01 a    | 0.01 ± 0.00 a   | 0.064               |
| NH <sub>4</sub> <sup>+</sup> (mg kg <sup>-1</sup> )              | 2.01 ± 3.31 ac   | 1.98 ± 1.43 a   | 0.01 ± 0.50 b   | 0.29 ± 0.54 bc   | 0.21 ± 0.35 abc | <b><i>0.026</i></b> |
| Net nitrification rate (mg N kg <sup>-1</sup> d <sup>-1</sup> )  | 0.28 ± 0.98 a    | 0.00 ± 4.50 a   | 1.52 ± 2.57 a   | 0.07 ± 0.05 a    | 0.02 ± 0.06 a   | 0.644               |
| Net mineralization rate (mg N kg <sup>-1</sup> d <sup>-1</sup> ) | 0.42 ± 1.52 a    | -0.89 ± 4.20 a  | 1.22 ± 2.75 a   | -0.02 ± 0.10 a   | -0.05 ± 0.05 a  | 0.974               |
| Clay content (%)                                                 | 0.53 ± 0.20 abcd | 1.00 ± 0.35 a   | 0.90 ± 0.33 ac  | 0.41 ± 0.36 bd   | 0.19 ± 0.24 b   | <b><i>0.026</i></b> |
| Silt content (%)                                                 | 46.51 ± 20.42 bc | 74.74 ± 10.18 a | 55.84 ± 8.61 ac | 40.55 ± 32.60 bc | 19.44 ± 4.71 b  | <b><i>0.025</i></b> |
| Sand content (%)                                                 | 52.57 ± 20.62 ac | 24.26 ± 10.52 b | 41.95 ± 7.52 bc | 59.04 ± 32.95 ac | 80.38 ± 4.95 a  | <b><i>0.026</i></b> |
| Soil water content (%)                                           | 24.37 ± 22.99 b  | 72.74 ± 14.05 a | 17.25 ± 10.44 b | 38.97 ± 12.36 ab | 19.66 ± 3.58 b  | <b><i>0.028</i></b> |

Notes: Values in the table are mean ± standard deviation (Forest: *N*=8; Grassland: *N*=4; Cropland: *N*=8; Wetland: *N*=3; Bare land: *N*=2). TN: total nitrogen; TC: total carbon; C/N ratio: TC/TN; Clay: particle size less than 0.002 mm; silt: particle size between 0.002 mm and 0.05 mm; sand: particle size more than 0.05 mm. Kruskal-Wallis test was used for one-way ANOVA between groups. Values in bold italics indicate significant differences (*p* < 0.05), and different lowercase letters show differences between groups.

**Table S6. Statistics on the sequencing of bacterial, archaeal and fungal communities.**

| Community type | Bacteria | Archaea | Fungi   |
|----------------|----------|---------|---------|
| Raw Reads      | 1349099  | 1179084 | 1979324 |
| Sequences      | 1202964  | 1079854 | 1589093 |
| OTU            | 8355     | 531     | 5806    |
| Phylum         | 50       | 12      | 17      |
| Class          | 154      | 18      | 62      |
| Order          | 381      | 29      | 167     |
| Family         | 631      | 39      | 386     |
| Genus          | 1297     | 57      | 926     |
| Species        | 2757     | 111     | 1629    |

**Table S7. Number of shared and unique species between groups based on OTU levels.**

| Group                                               | Bacteria | Archaea | Fungi |
|-----------------------------------------------------|----------|---------|-------|
| Bare land × Cropland × Forest × Grassland × Wetland | 878      | 46      | 75    |
| Bare land × Cropland × Forest × Grassland           | 84       | 1       | 16    |
| Bare land × Cropland × Forest × Wetland             | 387      | 15      | 40    |
| Bare land × Cropland × Grassland × Wetland          | 33       | 1       | 4     |
| Bare land × Forest × Grassland × Wetland            | 75       | 12      | 6     |
| Cropland × Forest × Grassland × Wetland             | 723      | 6       | 116   |
| Bare land × Cropland × Forest                       | 268      | 7       | 27    |
| Bare land × Cropland × Grassland                    | 7        | 0       | 1     |
| Bare land × Cropland × Wetland                      | 69       | 3       | 6     |
| Bare land × Forest × Grassland                      | 11       | 0       | 5     |
| Bare land × Forest × Wetland                        | 215      | 11      | 24    |
| Bare land × Grassland × Wetland                     | 40       | 5       | 7     |
| Cropland × Forest × Grassland                       | 509      | 1       | 157   |
| Cropland × Forest × Wetland                         | 282      | 0       | 110   |
| Cropland × Grassland × Wetland                      | 82       | 1       | 44    |
| Forest × Grassland × Wetland                        | 148      | 5       | 49    |
| Bare land × Cropland                                | 38       | 0       | 18    |
| Bare land × Forest                                  | 104      | 3       | 23    |
| Bare land × Grassland                               | 7        | 0       | 3     |
| Bare land × Wetland                                 | 311      | 23      | 86    |
| Cropland × Forest                                   | 1076     | 9       | 508   |
| Cropland × Grassland                                | 129      | 0       | 131   |
| Cropland & Wetland                                  | 90       | 2       | 81    |
| Forest × Grassland                                  | 228      | 13      | 124   |
| Forest × Wetland                                    | 134      | 5       | 134   |
| Grassland × Wetland                                 | 178      | 5       | 119   |
| Bare land                                           | 136      | 23      | 170   |
| Cropland                                            | 603      | 24      | 1178  |
| Forest                                              | 610      | 146     | 1033  |
| Grassland                                           | 313      | 107     | 676   |
| Wetland                                             | 587      | 57      | 835   |

**Table S8. Alpha diversity of soil microbial communities.**

| Community type | Index Type      |                  | Forest             | Cropland           | Grassland          | Wetland            | Bare land          | <i>p</i> value |
|----------------|-----------------|------------------|--------------------|--------------------|--------------------|--------------------|--------------------|----------------|
| Bacteria       | Richness        | ACE              | 2376.33 ± 160.27 a | 2814.21 ± 237.24 a | 2169.85 ± 300.52 a | 2863.85 ± 465.82 a | 2770.96 ± 102.05 a | 0.2976         |
|                |                 | Chao1            | 2371.09 ± 152.26 a | 2801.99 ± 233.73 a | 2164.14 ± 295.01 a | 2874.51 ± 467.83 a | 2514.90 ± 150.15 a | 0.2529         |
|                |                 | Observed species | 1829.36 ± 123.57 a | 2173.84 ± 179.97 a | 1736.19 ± 212.46 a | 2256.83 ± 366.06 a | 1808.70 ± 232.00 a | 0.2747         |
|                | Evenness        | Pielou           | 0.76 ± 0.02 a      | 0.81 ± 0.01 a      | 0.78 ± 0.02 a      | 0.82 ± 0.01 a      | 0.75 ± 0.05 a      | 0.2401         |
|                |                 | equitability     | 0.04 ± 0.01 a      | 0.07 ± 0.01 a      | 0.06 ± 0.01 a      | 0.10 ± 0.01 a      | 0.06 ± 0.02 a      | 0.0799         |
|                | Diversity       | Shannon          | 5.68 ± 0.17 a      | 6.17 ± 0.16 a      | 5.79 ± 0.26 a      | 6.33 ± 0.23 a      | 5.63 ± 0.49 a      | 0.2491         |
|                |                 | Simpson          | 0.02 ± 0.00 a      | 0.01 ± 0.01 a      | 0.2019         |
| Coverage       | Good's coverage | 0.98 ± 0.00 a    | 0.98 ± 0.00 a      | 0.98 ± 0.00 a      | 0.98 ± 0.00 a      | 0.98 ± 0.00 a      | 0.3634             |                |
| Archaea        | Richness        | ACE              | 76.61 ± 14.23 abc  | 56.15 ± 3.88 b     | 82.98 ± 13.63 abc  | 116.75 ± 26.54 ac  | 115.88 ± 2.48 a    | <b>0.0398</b>  |
|                |                 | Chao1            | 77.65 ± 14.28 abc  | 56.20 ± 4.10 b     | 82.09 ± 13.70 abc  | 117.49 ± 27.46 ac  | 116.10 ± 2.90 a    | <b>0.0395</b>  |
|                |                 | Observed species | 73.66 ± 14.01 abc  | 49.61 ± 3.60 b     | 79.29 ± 14.30 abc  | 111.1 ± 25.83 ac   | 113.1 ± 1.50 a     | <b>0.0287</b>  |
|                | Evenness        | Pielou           | 0.52 ± 0.04 a      | 0.46 ± 0.05 a      | 0.43 ± 0.04 a      | 0.53 ± 0.06 a      | 0.57 ± 0.05 a      | 0.4487         |
|                |                 | equitability     | 0.09 ± 0.03 a      | 0.10 ± 0.02 a      | 0.05 ± 0.01 a      | 0.07 ± 0.01 a      | 0.06 ± 0.02 a      | 0.4261         |
|                | Diversity       | Shannon          | 2.16 ± 0.19 a      | 1.77 ± 0.20 a      | 1.86 ± 0.17 a      | 2.50 ± 0.41 a      | 2.69 ± 0.24 a      | 0.1355         |
|                |                 | Simpson          | 0.21 ± 0.03 a      | 0.29 ± 0.08 a      | 0.29 ± 0.05 a      | 0.17 ± 0.05 a      | 0.16 ± 0.05 a      | 0.5013         |
| Coverage       | Good's coverage | 1.00 ± 0.00 a    | 1.00 ± 0.00 a      | 1.00 ± 0.00 a      | 1.00 ± 0.00 a      | 1.00 ± 0.00 a      | 0.2714             |                |
| Fungi          | Richness        | ACE              | 537.11 ± 79.02 a   | 774.96 ± 72.60 a   | 621.89 ± 115.18 a  | 752.57 ± 106.81 a  | 332.92 ± 9.11 a    | 0.0660         |
|                |                 | Chao1            | 532.69 ± 78.48 a   | 769.93 ± 72.46 a   | 622.74 ± 112.82 a  | 763.89 ± 116.89 a  | 339.49 ± 5.10 a    | 0.0565         |
|                |                 | Observed species | 474.3 ± 71.56 abd  | 678.7 ± 60.33 ac   | 561.2 ± 96.09 abcd | 733.5 ± 104.73 a   | 288.3 ± 48.50 b    | <b>0.0396</b>  |
|                | Evenness        | Pielou           | 0.53 ± 0.04 a      | 0.63 ± 0.02 a      | 0.61 ± 0.02 a      | 0.67 ± 0.07 a      | 0.37 ± 0.12 a      | 0.0733         |
|                |                 | equitability     | 0.02 ± 0.00 abd    | 0.04 ± 0.01 ac     | 0.04 ± 0.00 a      | 0.05 ± 0.03 abcd   | 0.01 ± 0.00 b      | <b>0.0465</b>  |
|                | Diversity       | Shannon          | 3.24 ± 0.25 bd     | 4.06 ± 0.15 ac     | 3.83 ± 0.22 abcd   | 4.43 ± 0.55 a      | 2.09 ± 0.75 b      | <b>0.0325</b>  |
|                |                 | Simpson          | 0.14 ± 0.03 ab     | 0.05 ± 0.01 bc     | 0.05 ± 0.01 bc     | 0.05 ± 0.02 b      | 0.33 ± 0.13 a      | <b>0.0171</b>  |
| Coverage       | Good's coverage | 1.00 ± 0.00 a    | 1.00 ± 0.00 a      | 1.00 ± 0.00 a      | 1.00 ± 0.00 a      | 1.00 ± 0.00 a      | 0.0886             |                |

Notes: Values in the table are mean ± SE (Forest: *N*=8; Grassland: *N*=4; Cropland: *N*=8; Wetland: *N*=3; Bare land: *N*=2); Kruskal-Wallis test was used for one-way ANOVA between groups, values in bold italics indicate significant differences (*p* < 0.05), and different lowercase letters show differences between groups.

**Table S9. Significance analysis of differences in soil microbial community structure.**

| Data sets | Group                 | Distance    | ANOSIM |                | Adonis         |                |
|-----------|-----------------------|-------------|--------|----------------|----------------|----------------|
|           |                       |             | R      | <i>p</i> value | R <sup>2</sup> | <i>Pr</i> (>F) |
| Bacteria  | All groups            | Bray-Curtis | 0.3614 | <b>0.001</b>   | 0.3321         | <b>0.001</b>   |
|           | Forest × Grassland    |             | 0.0901 | 0.213          | 0.1578         | 0.057          |
|           | Forest × Cropland     |             | 0.0452 | 0.194          | 0.0962         | 0.102          |
|           | Forest × Wetland      |             | 0.2930 | 0.084          | 0.1708         | <b>0.047</b>   |
|           | Forest × Bare land    |             | 0.5129 | <b>0.028</b>   | 0.1950         | 0.060          |
|           | Cropland × Grassland  |             | 0.6801 | <b>0.008</b>   | 0.3201         | <b>0.002</b>   |
|           | Cropland × Wetland    |             | 0.6882 | <b>0.016</b>   | 0.2827         | <b>0.005</b>   |
|           | Cropland × Bare land  |             | 0.8060 | 0.054          | 0.3197         | <b>0.030</b>   |
|           | Grassland × Wetland   |             | 0.6296 | <b>0.023</b>   | 0.3398         | <b>0.027</b>   |
|           | Grassland × Bare land |             | 1.0000 | 0.063          | 0.4899         | 0.067          |
|           | Wetland × Bare land   |             | 0.1667 | 0.317          | 0.2908         | 0.200          |
| Archaea   | All groups            | Bray-Curtis | 0.3841 | <b>0.001</b>   | 0.3528         | <b>0.001</b>   |
|           | Forest × Grassland    |             | 0.3474 | <b>0.036</b>   | 0.2168         | <b>0.046</b>   |
|           | Forest × Cropland     |             | 0.0290 | 0.246          | 0.0805         | 0.257          |
|           | Forest × Wetland      |             | 0.5134 | <b>0.019</b>   | 0.2514         | <b>0.011</b>   |
|           | Forest × Bare land    |             | 0.0733 | 0.266          | 0.1513         | 0.160          |
|           | Cropland × Grassland  |             | 0.8033 | <b>0.002</b>   | 0.3631         | <b>0.002</b>   |
|           | Cropland × Wetland    |             | 0.8091 | <b>0.007</b>   | 0.3286         | <b>0.005</b>   |
|           | Cropland × Bare land  |             | 0.4698 | 0.096          | 0.2194         | 0.072          |
|           | Grassland × Wetland   |             | 0.5556 | 0.057          | 0.3169         | 0.084          |
|           | Grassland × Bare land |             | 0.5357 | 0.063          | 0.3911         | 0.067          |
|           | Wetland × Bare land   |             | 0.3333 | 0.199          | 0.2885         | 0.300          |
| Fungi     | All groups            | Bray-Curtis | 0.3945 | <b>0.001</b>   | 0.2505         | <b>0.001</b>   |
|           | Forest × Grassland    |             | 0.0313 | 0.394          | 0.1104         | 0.061          |
|           | Forest × Cropland     |             | 0.1908 | <b>0.007</b>   | 0.1202         | <b>0.001</b>   |
|           | Forest × Wetland      |             | 0.0753 | 0.362          | 0.1244         | <b>0.013</b>   |
|           | Forest × Bare land    |             | 0.6379 | <b>0.028</b>   | 0.1283         | <b>0.047</b>   |
|           | Cropland × Grassland  |             | 0.7022 | <b>0.002</b>   | 0.1814         | <b>0.002</b>   |
|           | Cropland × Wetland    |             | 0.9086 | <b>0.004</b>   | 0.2153         | <b>0.005</b>   |
|           | Cropland × Bare land  |             | 0.9914 | <b>0.028</b>   | 0.2219         | <b>0.030</b>   |
|           | Grassland × Wetland   |             | 0.5185 | <b>0.023</b>   | 0.2267         | <b>0.027</b>   |
|           | Grassland × Bare land |             | 1.0000 | 0.063          | 0.2671         | 0.067          |
|           | Wetland × Bare land   |             | 0.1667 | 0.519          | 0.2746         | 0.400          |

Notes: the closer the R value to 1 in ANOSIM indicates that the difference between groups is greater than the difference within groups, and vice versa. The larger the R<sup>2</sup> in Adonis indicates that the subgroups have a higher degree of explanation of the differences. The *Pr* indicates the *p* value, which is less than 0.05, indicating that the test has a high degree of availability.

**Table S10. Annual soil emissions of HONO, NO and NO<sub>x</sub> from different land use types in Tibet in 2011.**

| Land use type | Annual soil emissions (Gg N yr <sup>-1</sup> ) |             |                 |
|---------------|------------------------------------------------|-------------|-----------------|
|               | HONO                                           | NO          | NO <sub>x</sub> |
| Forest        | 1.5 ± 0.2                                      | 1.0 ± 0.7   | 1.3 ± 0.6       |
| Grassland     | 2.0 ± 1.1                                      | 5.2 ± 2.8   | 5.2 ± 2.8       |
| Cropland      | 0.5 ± 0.1                                      | 0.2 ± 0.1   | 0.3 ± 0.1       |
| Wetland       | < 0.1 ± 0.0                                    | < 0.1 ± 0.0 | < 0.1 ± 0.0     |
| Bare land     | 3.0 ± 2.0                                      | 5.3 ± 4.2   | 13.6 ± 3.6      |
| Total         | 7.0 ± 3.4                                      | 11.6 ± 7.8  | 20.3 ± 7.0      |

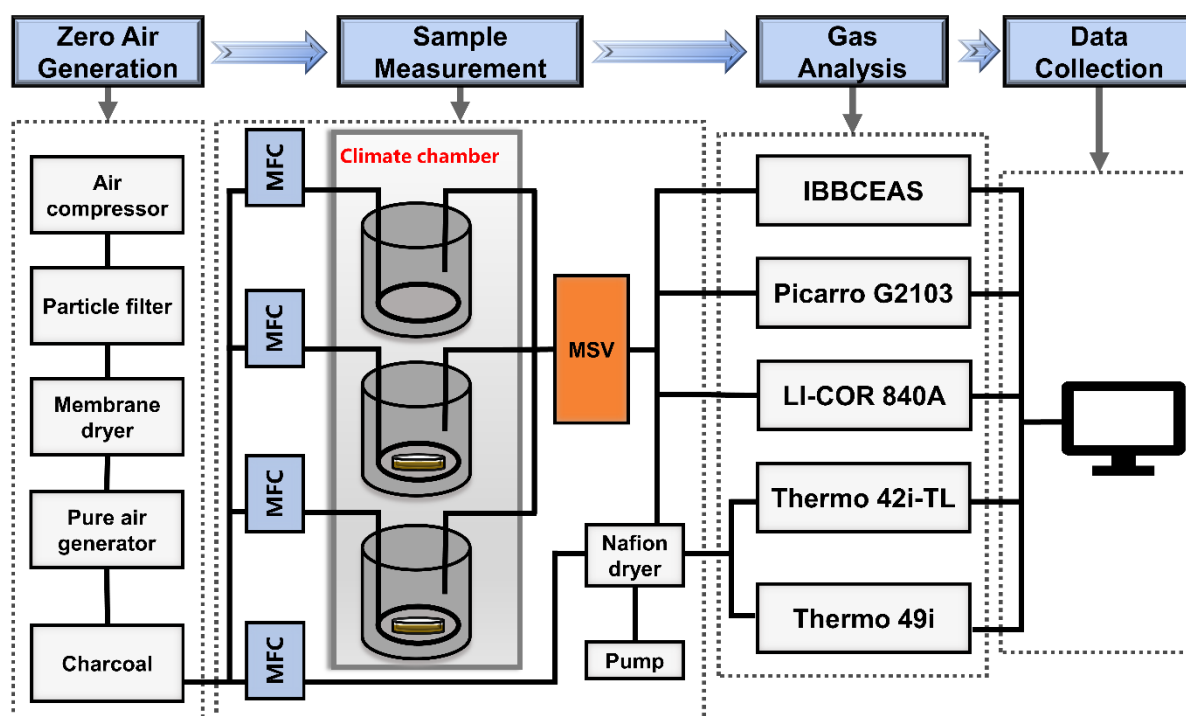

**Fig. S1. Schematic overview of the Multi-gaS dynamIC measurement system (MUSIC).** Pure air generator (Thermo, model 1150-111); MFC: mass flow controller ( $0 \sim 10 \text{ L min}^{-1}$  or  $0 \sim 20 \text{ L min}^{-1}$ , Bronckhorst, Germany); MSV: Multi-point switching valve; Nafion dryer (Model Perma Pure MD<sup>TM</sup>110, Perma Pure LLC, USA); IBBCEAS: Incoherent Broadband Cavity Enhanced Absorption Spectroscopy (AIOFM-CEAS-TY19-1); Ammonia Analyzer (Picarro G2103, USA); Infrared CO<sub>2</sub>/H<sub>2</sub>O analyzer (LI-COR 840A, Lincoln, NE, USA); Chemiluminescent NO<sub>x</sub> analyzer (Thermo 42i TL, Waltham, MA, USA); O<sub>3</sub> analyzer (Thermo 49i, USA).

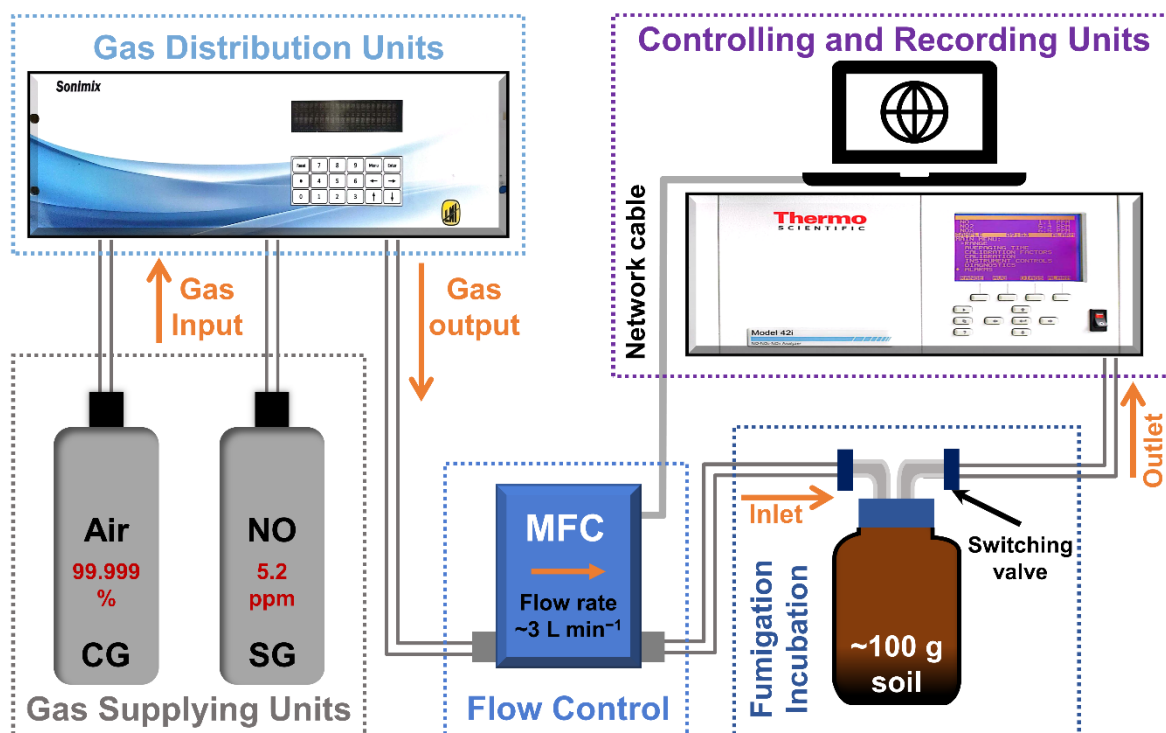

**Fig. S2. Overview of the schematic diagram of the fumigated incubation unit.** CG: carrier gas (dry oxygen 99.999%, Air Liquide, Shanghai); SG: NO standard gas (5.2 ppm, Air Liquide, Shanghai); Gas distribution units (SONIMIX 4001, LNI, Italy); MFC: mass flow controller ( $0 \sim 10 \text{ L min}^{-1}$ ; Bronckhorst, Germany); Controlling and recording units: Chemiluminescent  $\text{NO}_x$  analyser (Thermo 42i TL, Waltham, MA, USA).

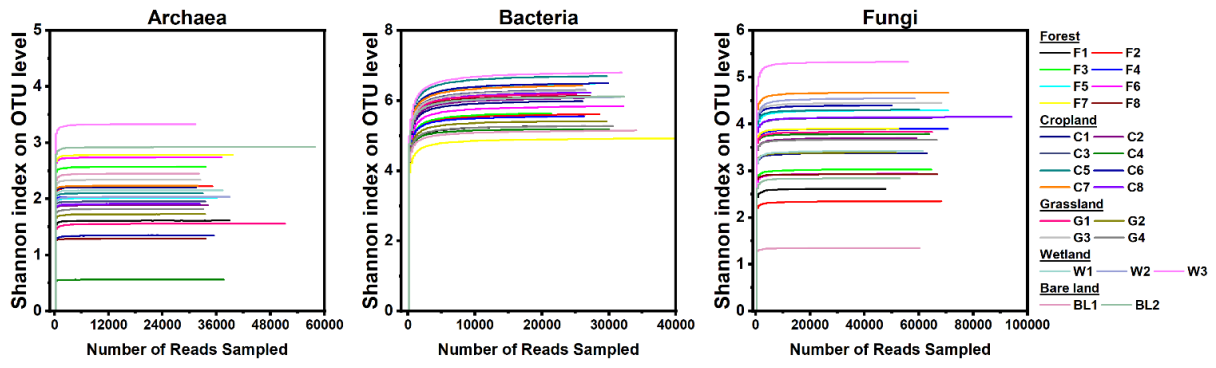

**Fig. S3. Soil archaea, bacteria and fungi rarefaction curve.**

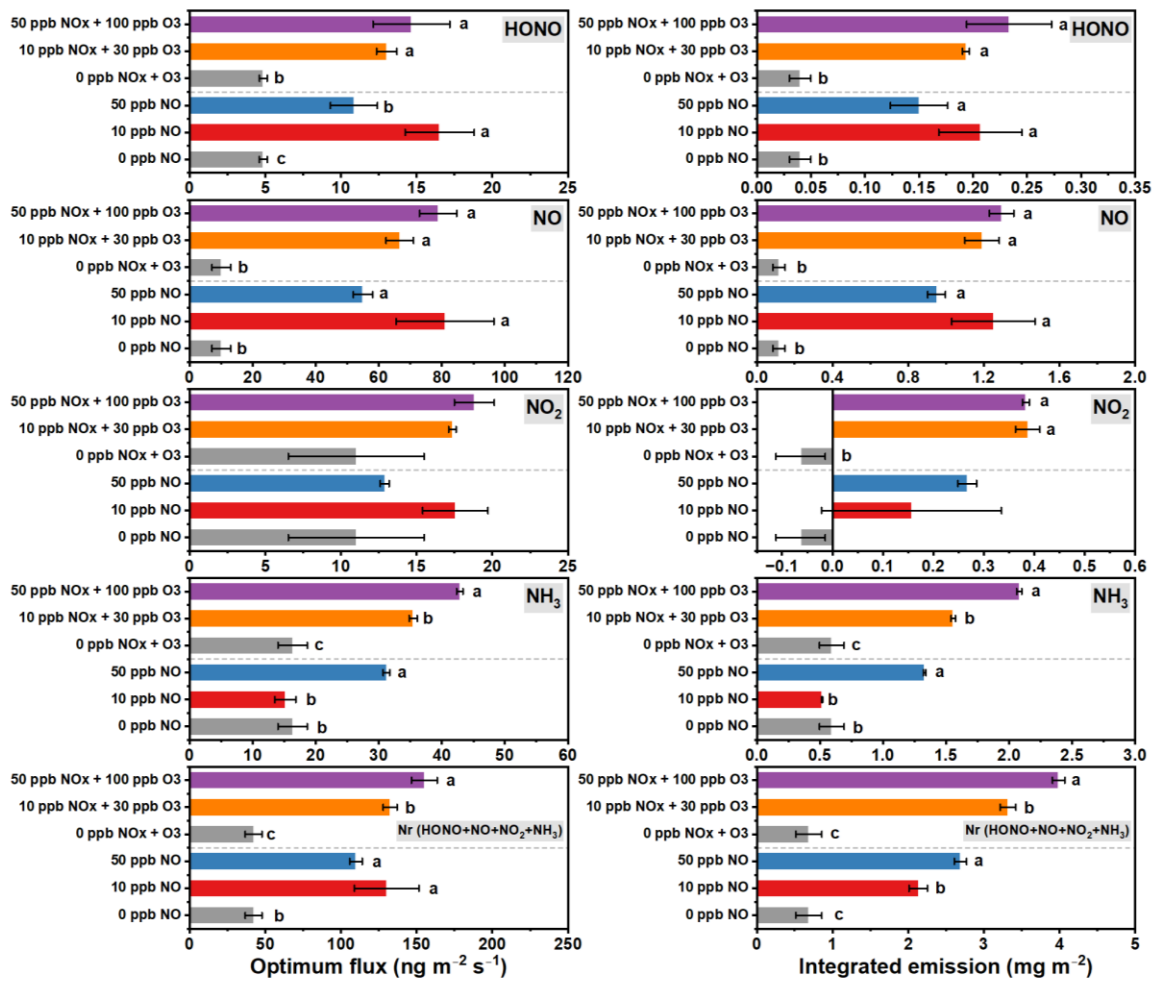

**Fig. S4. Optimum fluxes and integrated emissions of reactive nitrogen gases (HONO, NO, NO<sub>2</sub>, NH<sub>3</sub>) from forest soils under NO and NO<sub>x</sub>+O<sub>3</sub> fumigation treatments.** The error bars show the standard error of three replicates. Multiple comparisons were based on Duncan's method, with different lowercase letters indicating differences between treatments.

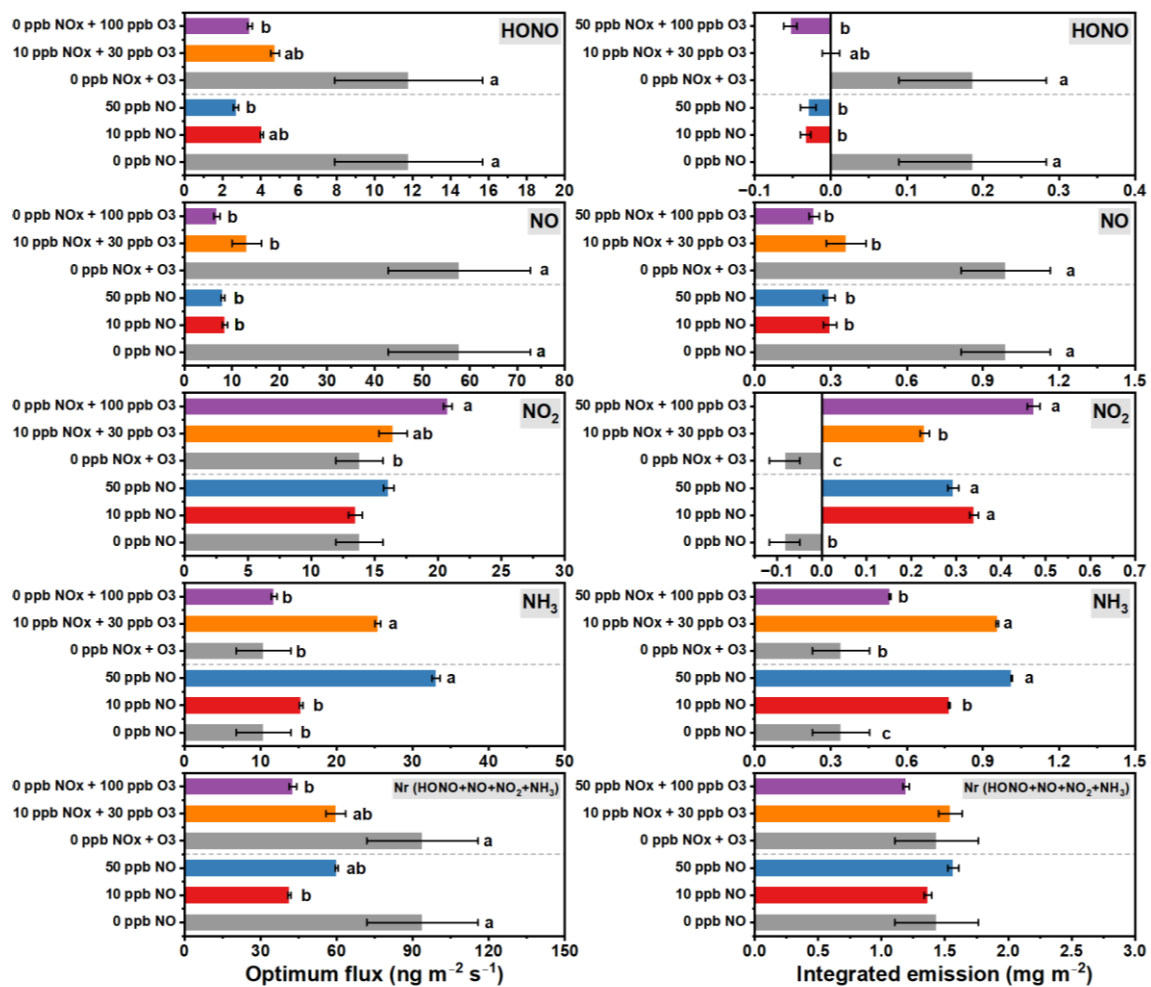

**Fig. S5.** Optimum fluxes and integrated emissions of reactive nitrogen gases (HONO, NO, NO<sub>2</sub>, NH<sub>3</sub>) from grassland soils under NO and NO<sub>x</sub>+O<sub>3</sub> fumigation treatments. The error bars show the standard error of three replicates. Multiple comparisons were based on Duncan's method, with different lowercase letters indicating differences between treatments.

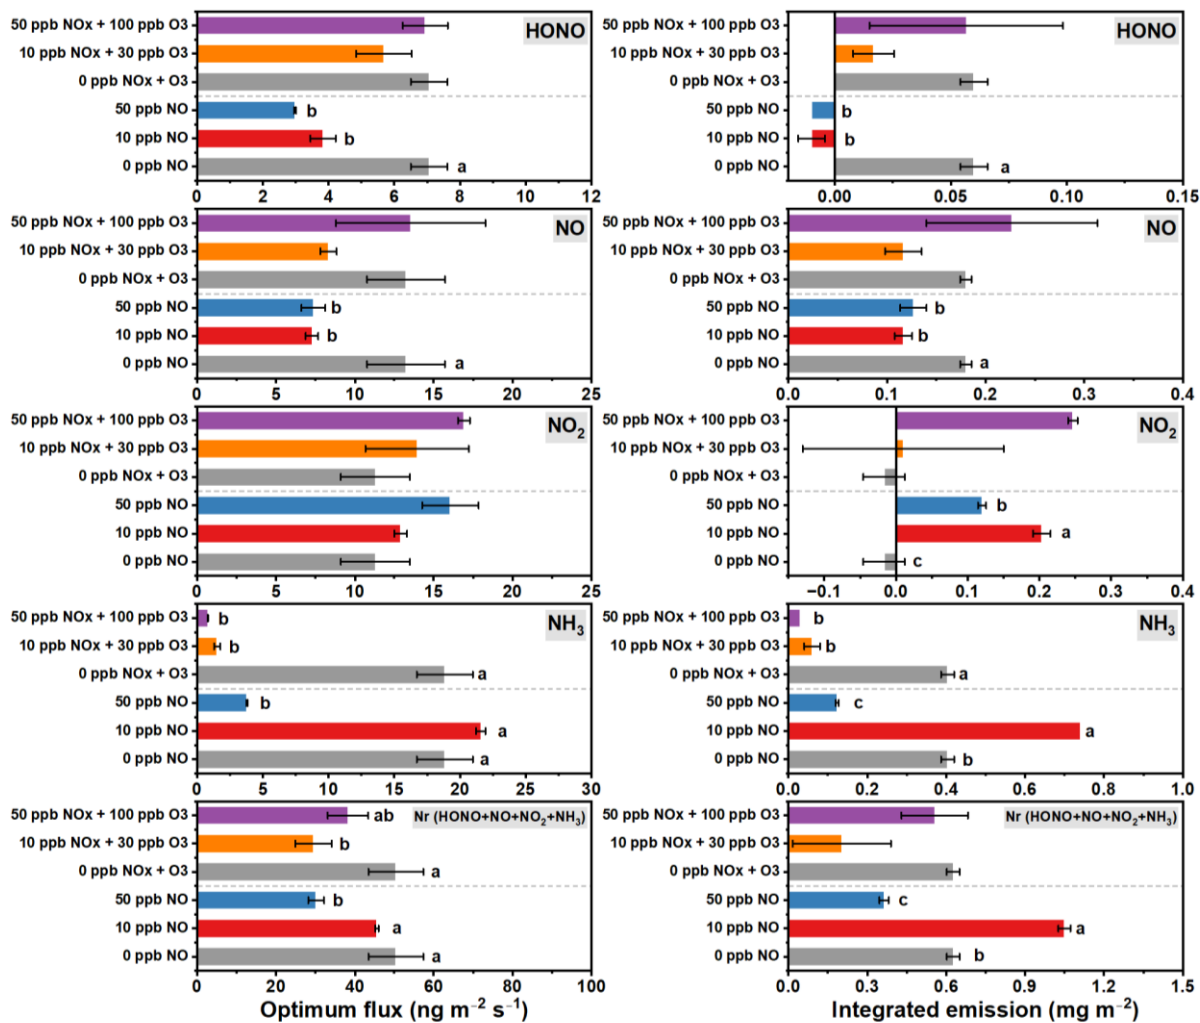

**Fig. S6. Optimum fluxes and integrated emissions of reactive nitrogen gases (HONO, NO, NO<sub>2</sub>, NH<sub>3</sub>) from cropland soils under NO and NO<sub>x</sub>+O<sub>3</sub> fumigation treatments.** The error bars show the standard error of three replicates. Multiple comparisons were based on Duncan's method, with different lowercase letters indicating differences between treatments.

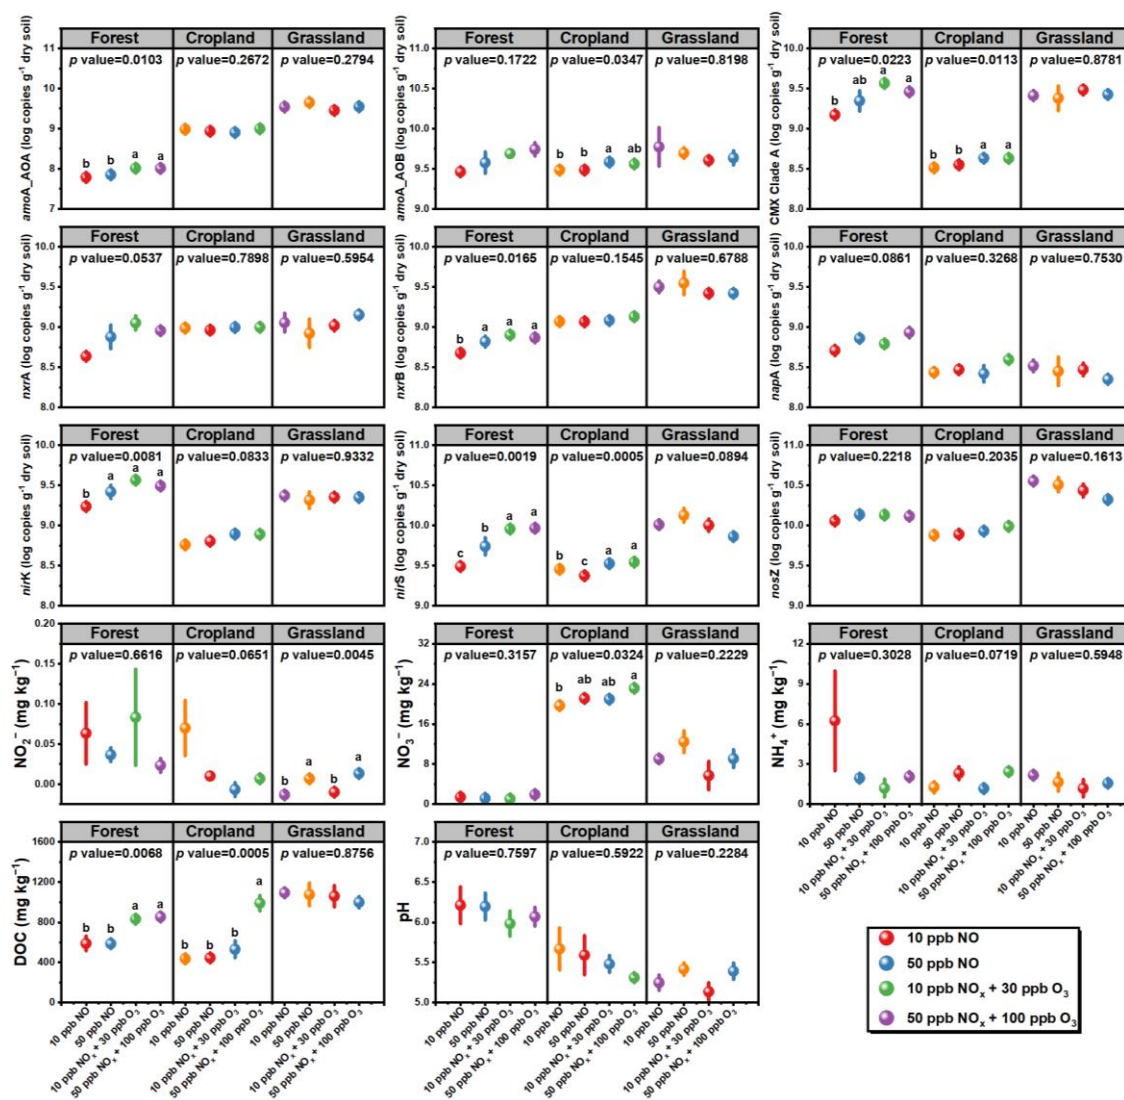

**Fig. S7. Soil physicochemical and biological properties under different fumigation patterns and concentrations.** The error bars show the standard error of three replicates. Multiple comparisons were based on Duncan's method, with different lowercase letters indicating differences between treatments.

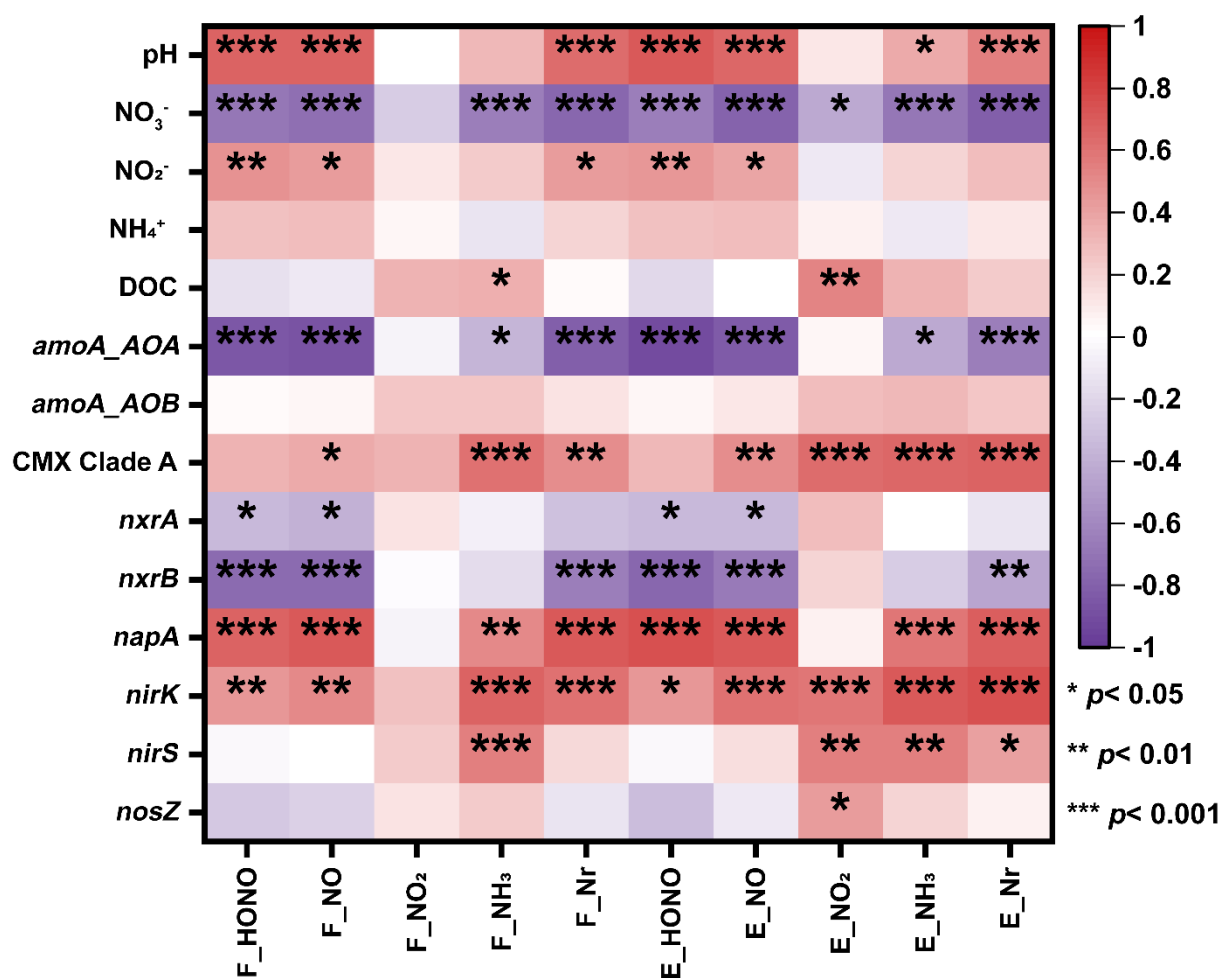

Fig. S8. Correlation matrix between fumigated soil physicochemical properties, functional genes and reactive nitrogen gas emission fluxes based on Pearson correlation analysis.

## References

- Gao, Y.-h., Ma, X. and Cooper, D.J.: Short-term effect of nitrogen addition on nitric oxide emissions from an alpine meadow in the Tibetan Plateau. *Environmental Science and Pollution Research* 23, 12474-12479, <https://dx.doi.org/https://doi.org/10.1007/s11356-016-6763-5>, 2016.
- Lin, F., Liu, C., Hu, X., Fu, Y., Zheng, X., Wang, R., Zhang, W. and Cao, G.: Characterizing nitric oxide emissions from two typical alpine ecosystems. *Journal of Environmental Sciences* 77, 312-322, <https://dx.doi.org/https://doi.org/10.1016/j.jes.2018.08.011>, 2019.
- Yao, Z., Ma, L., Zhang, H., Zheng, X., Wang, K., Zhu, B., Wang, R., Wang, Y., Zhang, W., Liu, C. and Butterbach-Bahl, K.: Characteristics of annual greenhouse gas flux and NO release from alpine meadow and forest on the eastern Tibetan Plateau. *Agricultural and Forest Meteorology* 272-273, 166-175, <https://dx.doi.org/https://doi.org/10.1016/j.agrformet.2019.04.007>, 2019.
- Zhang, H., Yao, Z., Wang, K., Zheng, X., Ma, L., Wang, R., Liu, C., Zhang, W., Zhu, B., Tang, X., Hu, Z. and Han, S.: Annual N<sub>2</sub>O emissions from conventionally grazed typical alpine grass meadows in the eastern Qinghai–Tibetan Plateau. *Science of The Total Environment* 625, 885-899, <https://dx.doi.org/https://doi.org/10.1016/j.scitotenv.2017.12.216>, 2018.
